# Supplementary material
Source: publisher site journal article supplement (https://www.dovepress.com/get_supplementary_file.php?f=196266.docx)

**Supplementary materials**


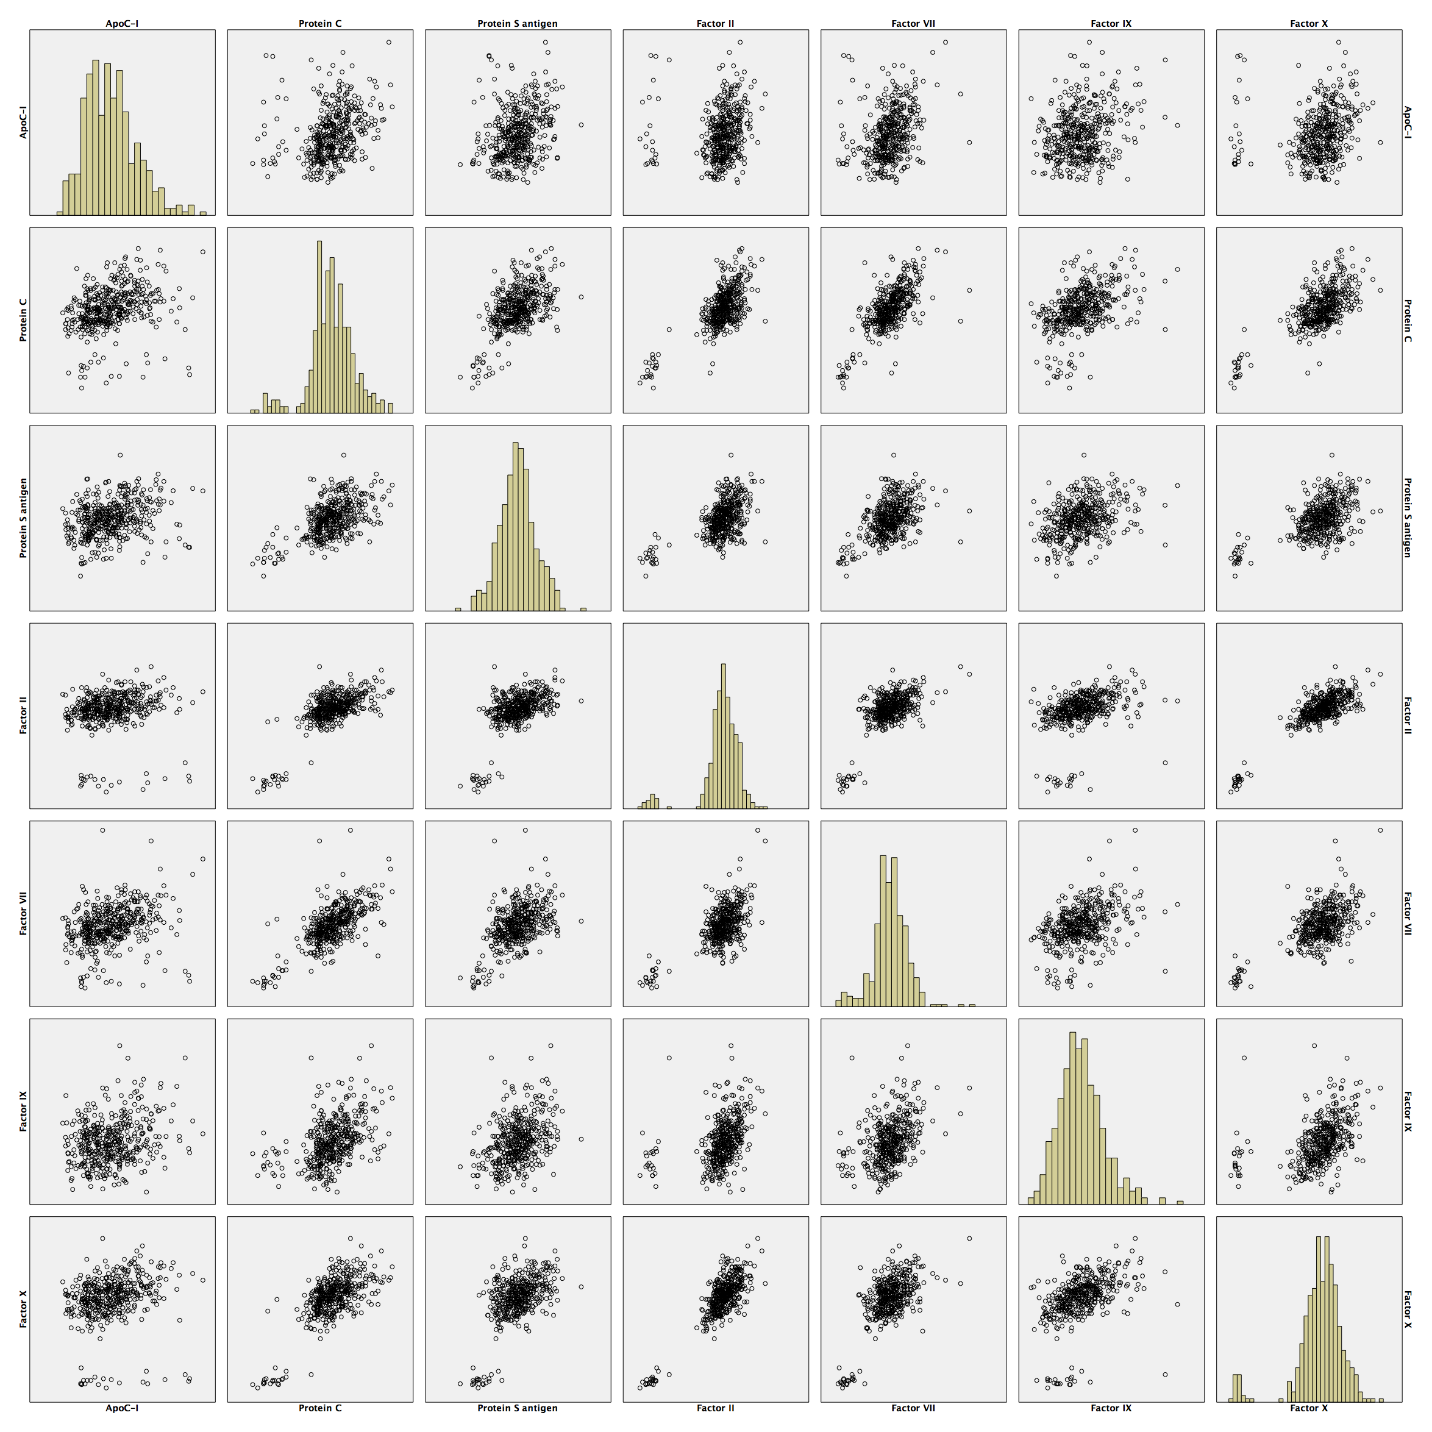


Figure S1


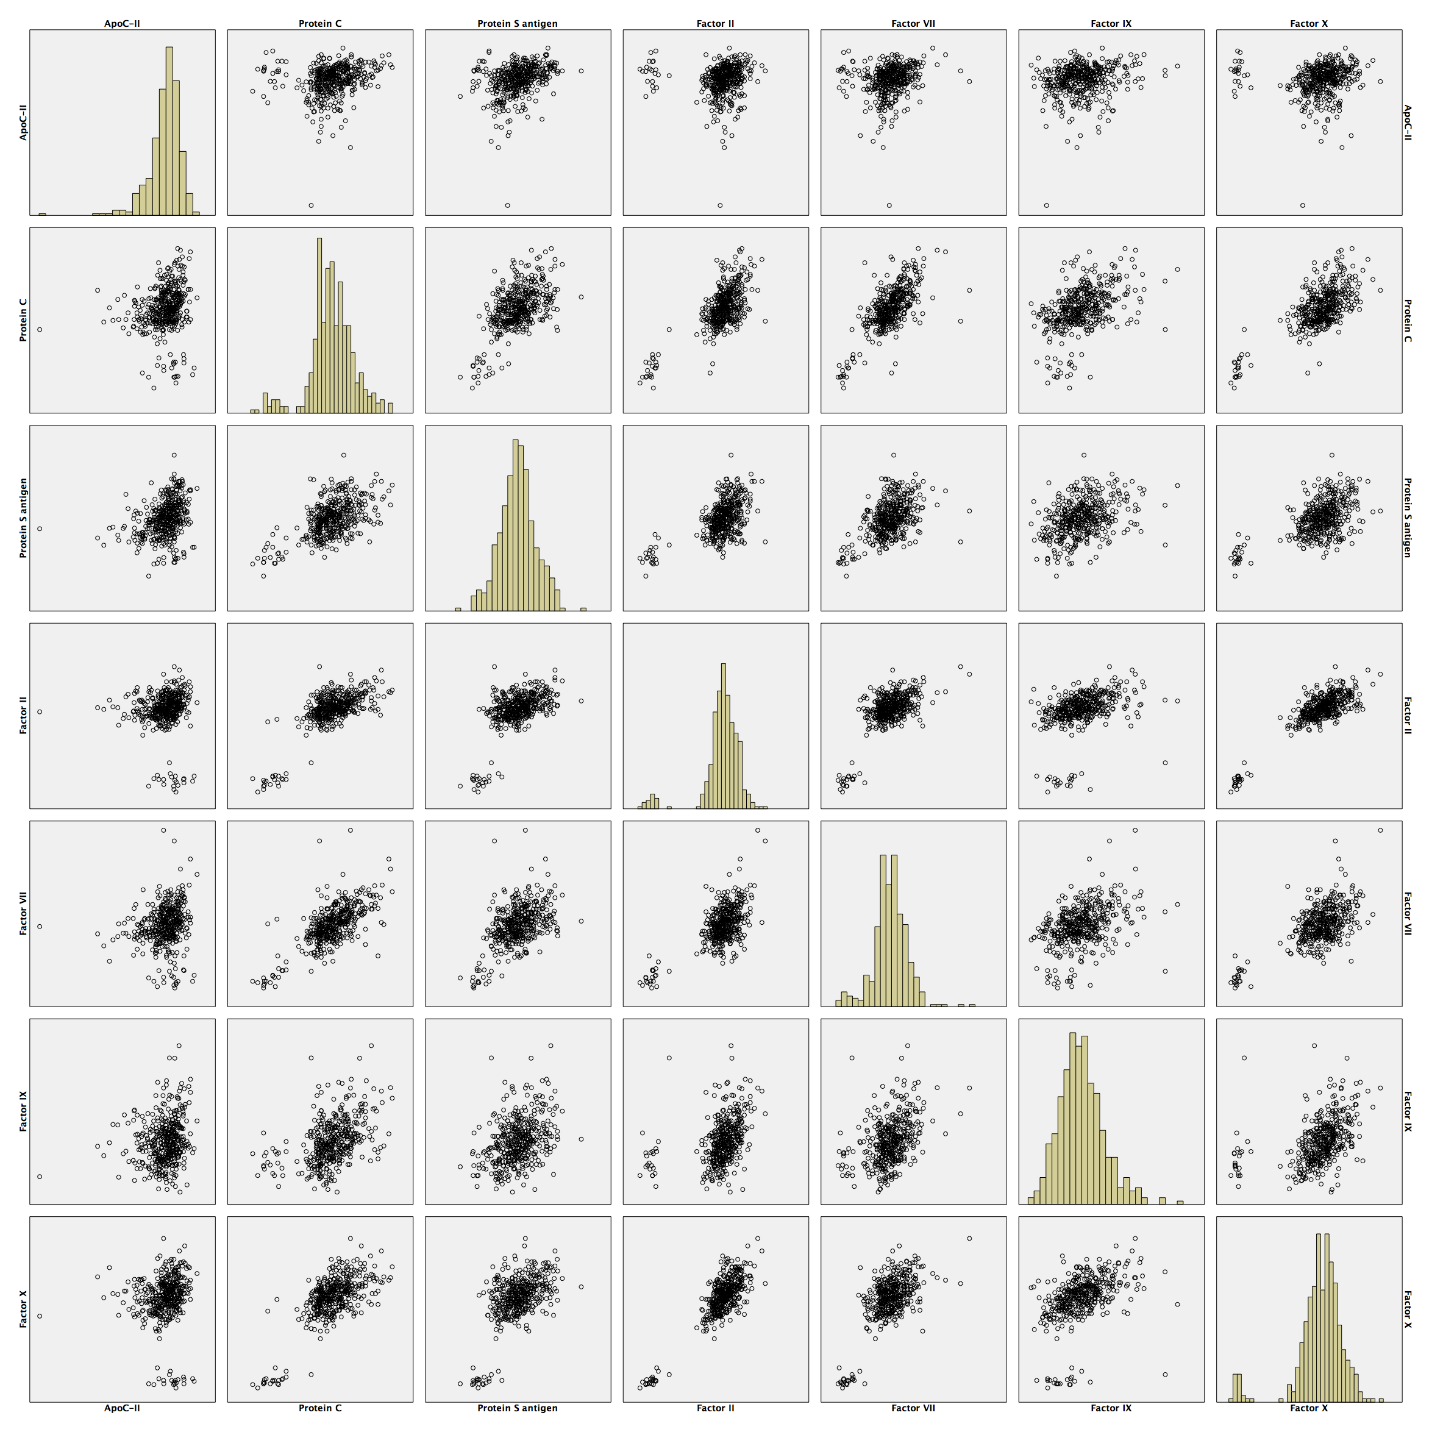


Figure S2


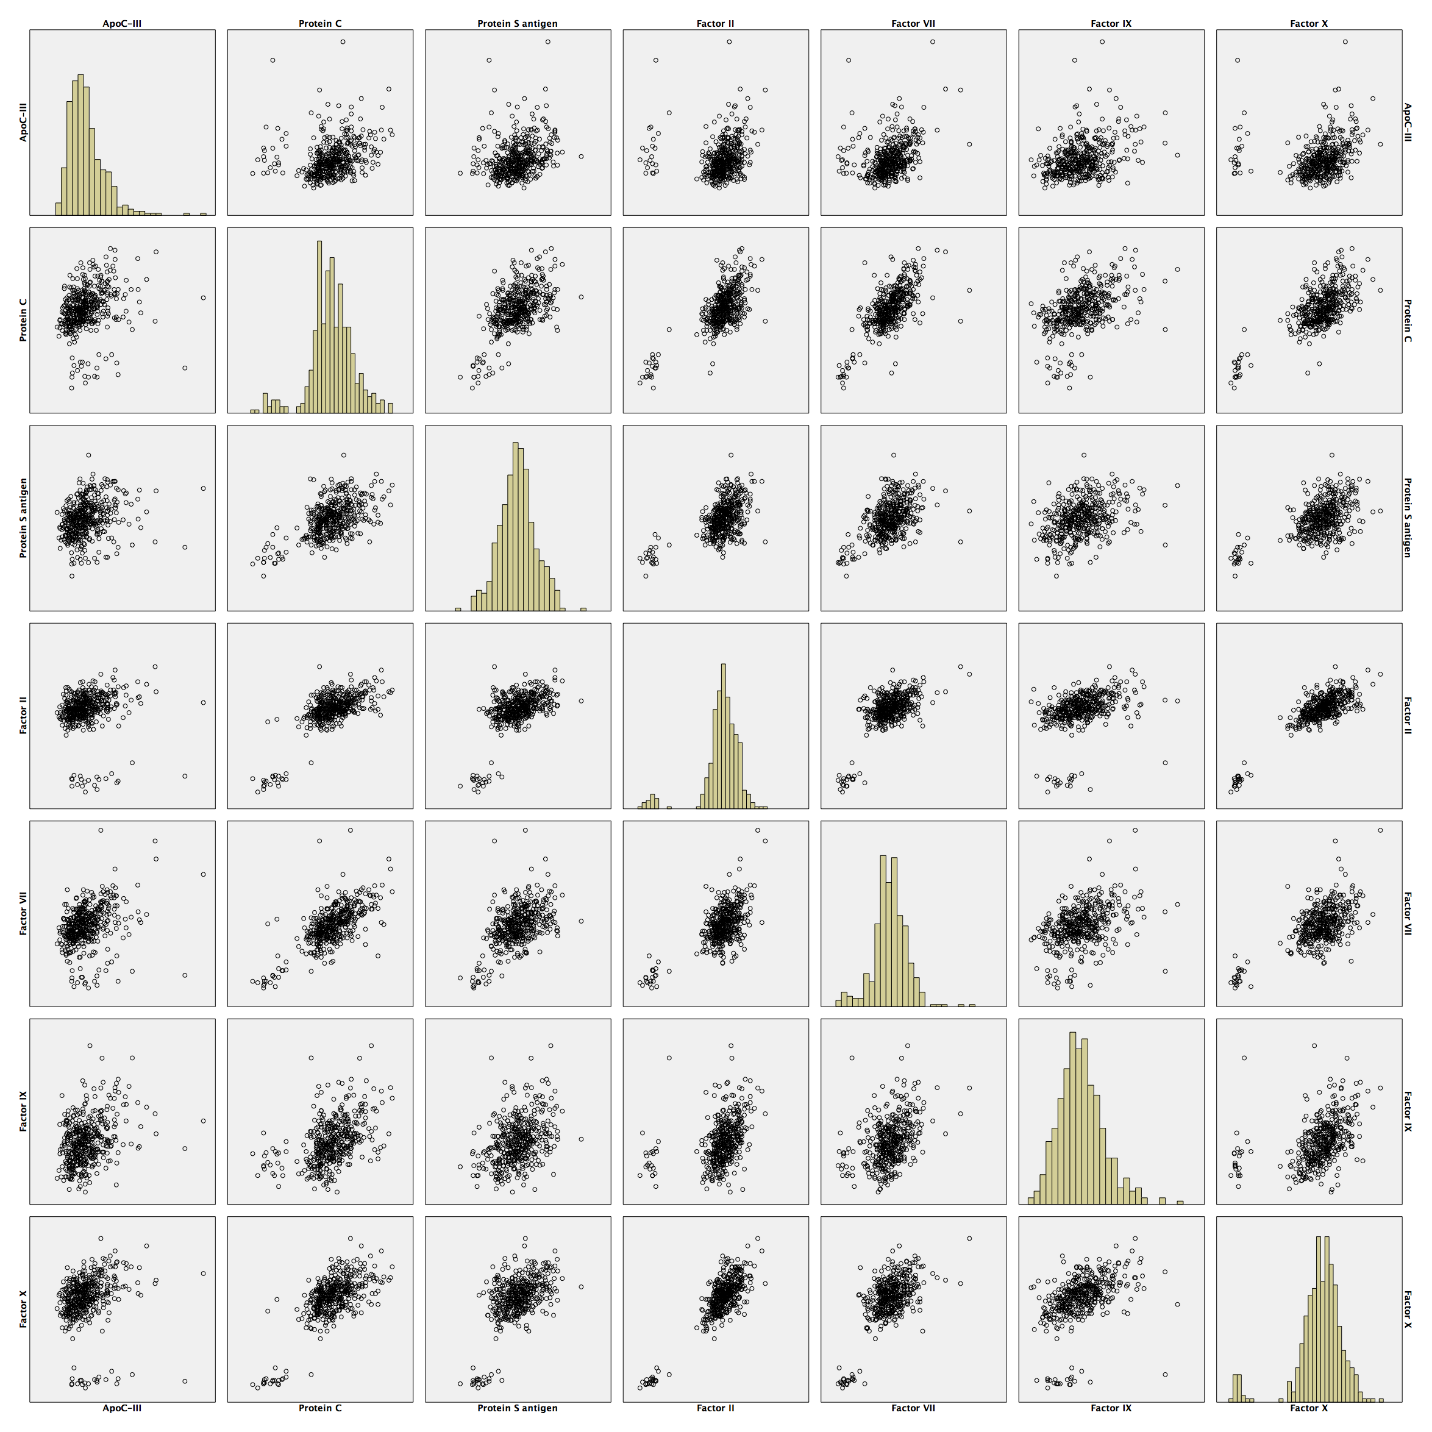


Figure S3


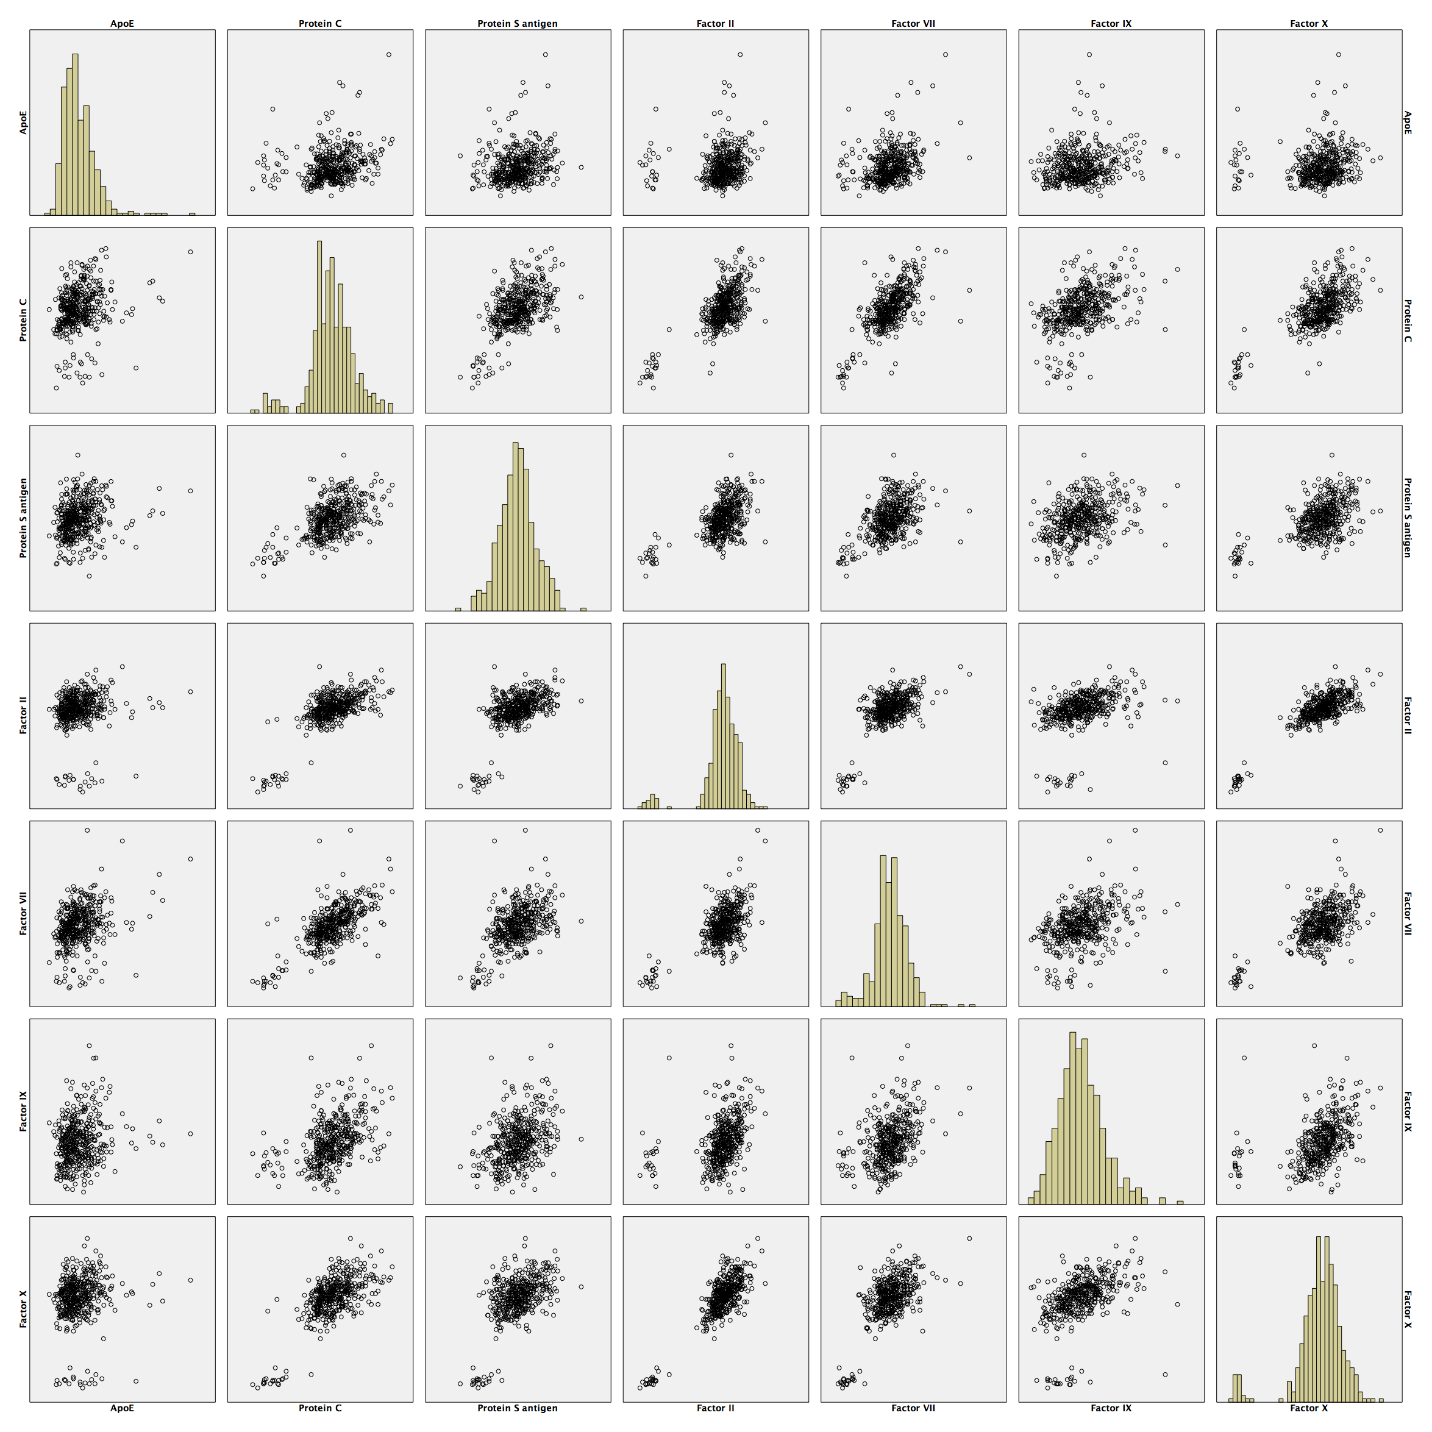


Figure S4


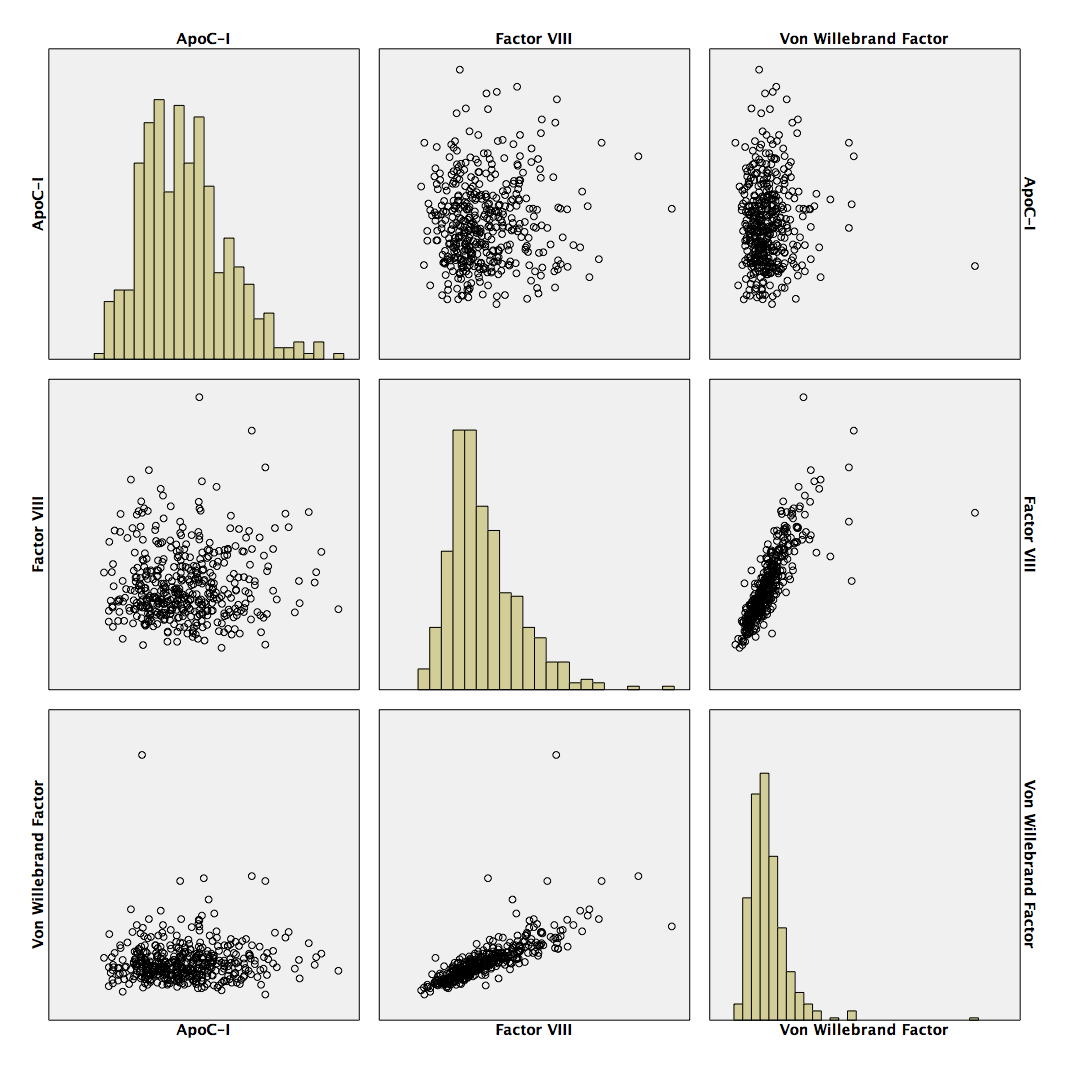


Figure S5


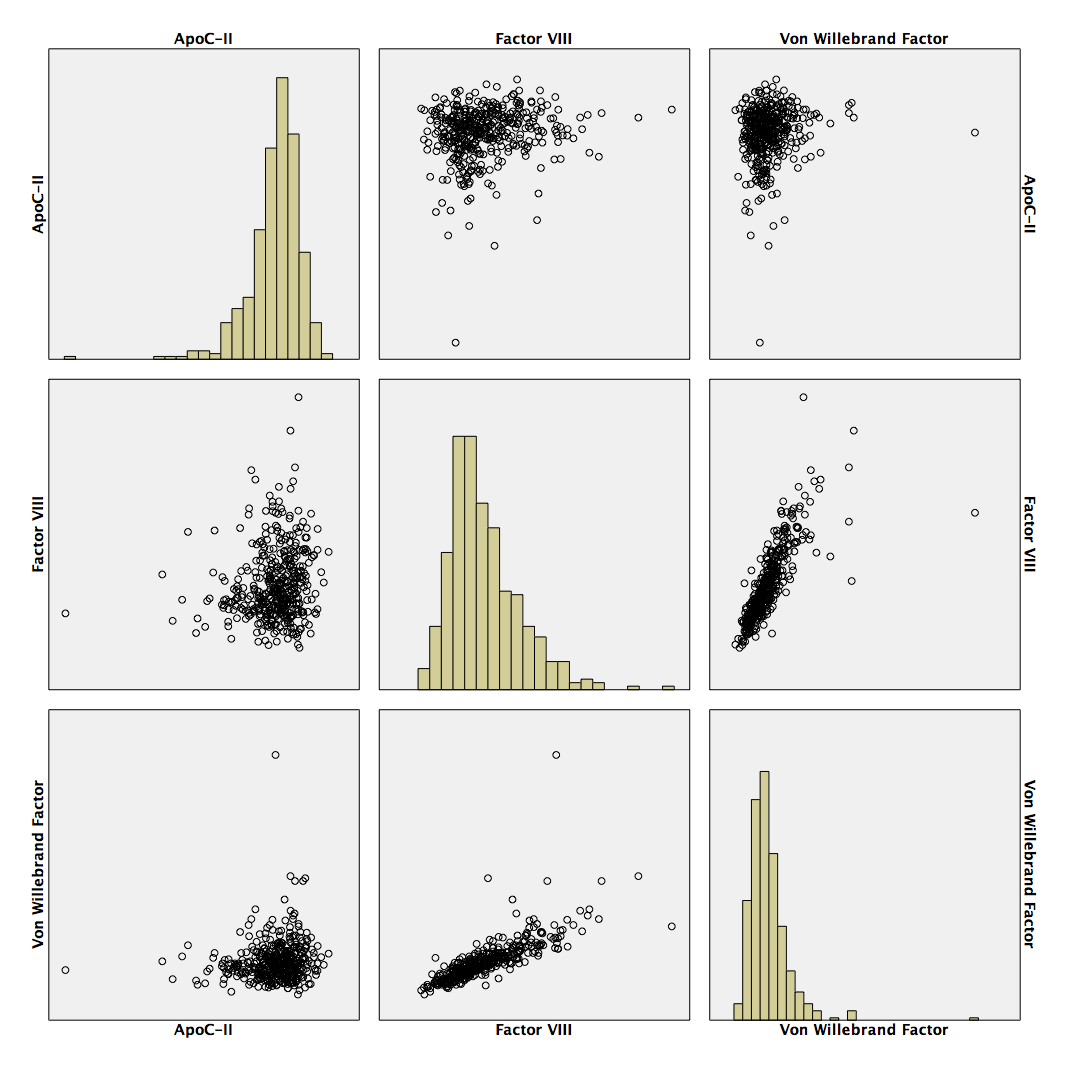


Figure S6


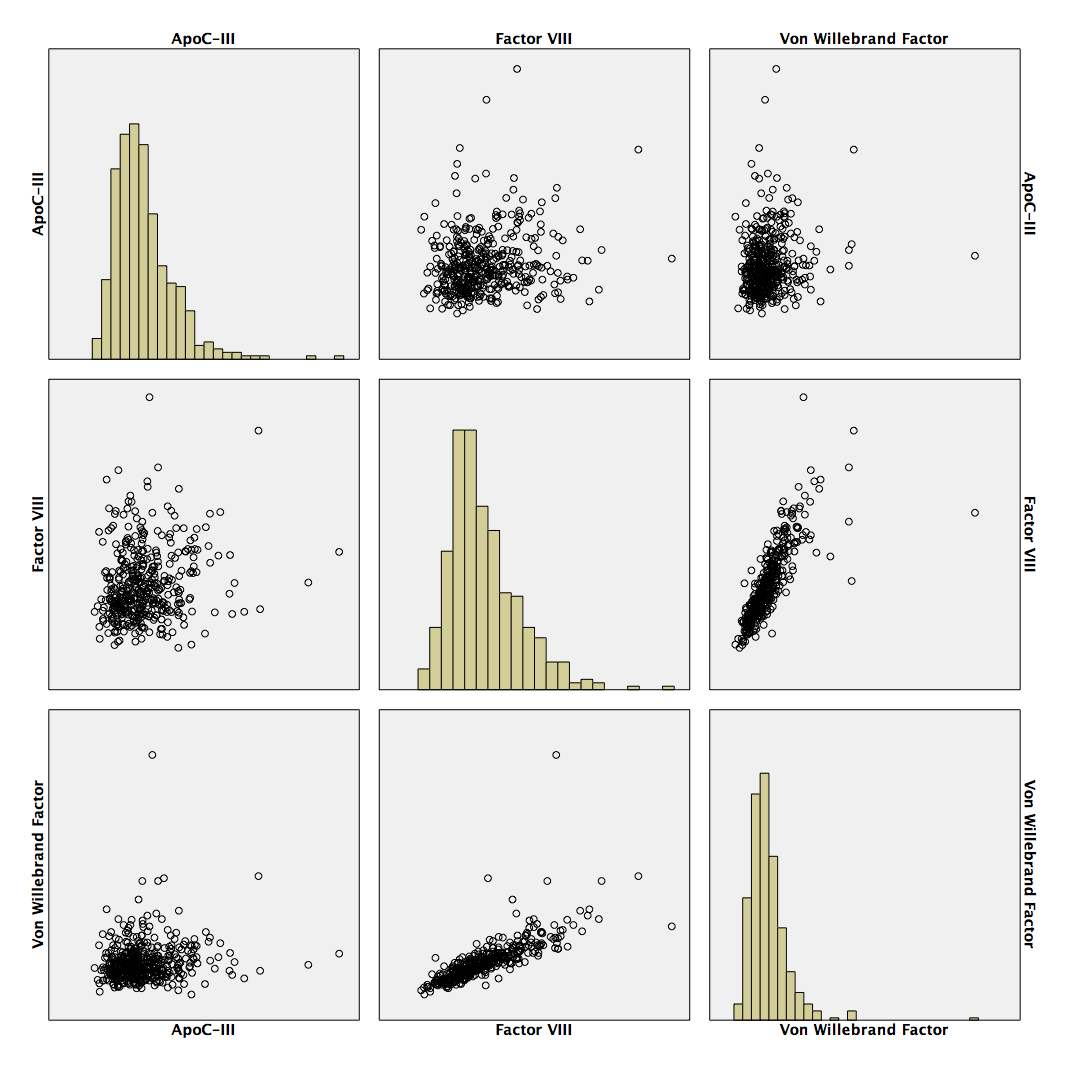


Figure S7


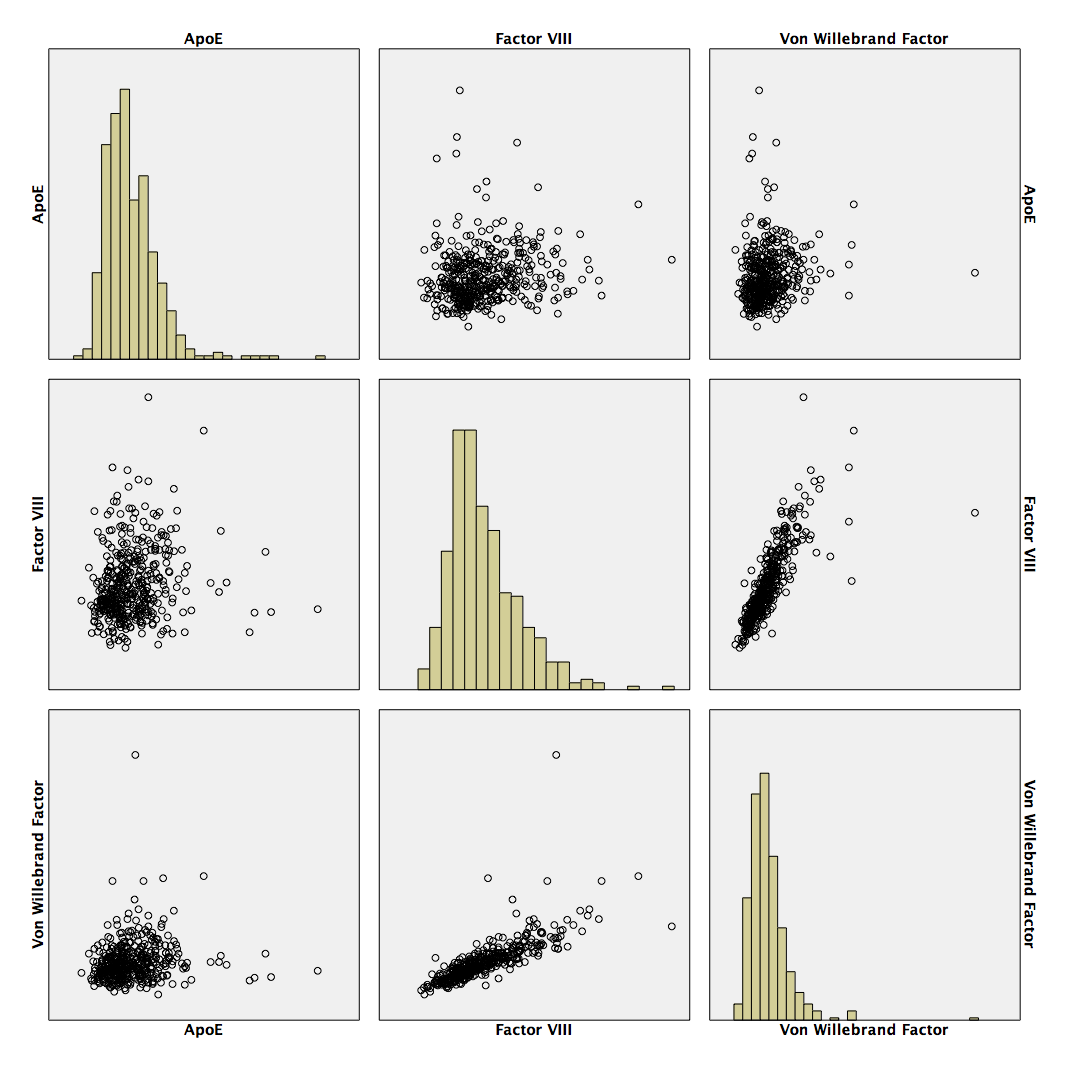


Figure S8

Supplement: Supplementary file 1 [file get_supplementary_file.php]
